# Supplementary material
Source: publisher figshare collection journal article supplement (https://tandf.figshare.com/articles/dataset/_/7010363)
Supplement: Supplementary file 1 [file 2]

Archive with 3 entries (3 files):
- icop_a_1485637_sm8887.pdf
- icop_a_1485637_sm1208.xps
- icop_a_1485637_sm1204.pdf
