# Supplementary material
Source: publisher figshare collection journal article supplement (https://tandf.figshare.com/articles/dataset/_/7010363)
Supplement: Supplementary file 1 [file 2 › icop_a_1485637_sm1204.pdf]

|                                                                                                              |
|--------------------------------------------------------------------------------------------------------------|
| <p><b>Subject:</b>     <i>Search Strategies: COPD and FeNO</i></p> <p><i>Searches run: June 29, 2016</i></p> |
|--------------------------------------------------------------------------------------------------------------|

**Contents**

|                                                |   |
|------------------------------------------------|---|
| Medline via OvidSP .....                       | 2 |
| Embase via OvidSP.....                         | 3 |
| CINAHL via EBSCOhost .....                     | 4 |
| Cochrane Library via Wiley Online.....         | 5 |
| Web of Science .....                           | 6 |
| BIOSIS Previews, BIOSIS Previews Archive ..... | 7 |
| Removal of duplicates.....                     | 8 |

## Search Strategies

### Medline via OvidSP

| Ovid MEDLINE(R) and Epub Ahead of Print, In-Process & Other Non-Indexed Citations, Ovid MEDLINE(R) Daily 1946 to Present |                                                                                                                                                                                                                                                                                                                                                                                                                                                                                                                            |         |
|--------------------------------------------------------------------------------------------------------------------------|----------------------------------------------------------------------------------------------------------------------------------------------------------------------------------------------------------------------------------------------------------------------------------------------------------------------------------------------------------------------------------------------------------------------------------------------------------------------------------------------------------------------------|---------|
| #                                                                                                                        | Searches                                                                                                                                                                                                                                                                                                                                                                                                                                                                                                                   | Results |
|                                                                                                                          |                                                                                                                                                                                                                                                                                                                                                                                                                                                                                                                            |         |
| 1                                                                                                                        | ("10712994" or "10907593" or "11296168" or "11413349" or "15817806" or "15939243" or "16289590" or "16646959" or "17426212" or "18460522" or "18547853" or "19124359" or "19401794" or "19820080" or "19881162" or "20210889" or "21143751" or "21530214" or "23445725" or "23509896" or "23681903" or "23989961" or "24013942" or "24719850" or "24929061" or "25053884" or "26252571" or "26372312" or "26491283" or "26496331" or "26497109" or "26814886" or "26916083" or "26952317" or "27142135" or "27209003").ui. | 36      |
| 2                                                                                                                        | exp Pulmonary Disease, Chronic Obstructive/                                                                                                                                                                                                                                                                                                                                                                                                                                                                                | 43308   |
| 3                                                                                                                        | Lung Diseases, Obstructive/                                                                                                                                                                                                                                                                                                                                                                                                                                                                                                | 18072   |
| 4                                                                                                                        | exp Pulmonary Emphysema/                                                                                                                                                                                                                                                                                                                                                                                                                                                                                                   | 14866   |
| 5                                                                                                                        | (obstructive adj2 (pulmonary or lung\$ or respirat\$ or air\$)).tw,kf.                                                                                                                                                                                                                                                                                                                                                                                                                                                     | 44058   |
| 6                                                                                                                        | (chronic air\$ adj2 (obstruction\$ or limitation\$ or occlusion\$)).tw,kf.                                                                                                                                                                                                                                                                                                                                                                                                                                                 | 1428    |
| 7                                                                                                                        | (chronic bronch\$ adj2 (obstruction\$ or limitation\$ or occlusion\$)).tw,kf.                                                                                                                                                                                                                                                                                                                                                                                                                                              | 95      |
| 8                                                                                                                        | (chronic\$ adj2 bronch\$).tw,kf.                                                                                                                                                                                                                                                                                                                                                                                                                                                                                           | 12908   |
| 9                                                                                                                        | COPD.tw,kf.                                                                                                                                                                                                                                                                                                                                                                                                                                                                                                                | 32628   |
| 10                                                                                                                       | COAD.tw,kf.                                                                                                                                                                                                                                                                                                                                                                                                                                                                                                                | 222     |
| 11                                                                                                                       | emphysema\$.tw,kf.                                                                                                                                                                                                                                                                                                                                                                                                                                                                                                         | 24011   |
| 12                                                                                                                       | (acos and asthm*).tw,kf.                                                                                                                                                                                                                                                                                                                                                                                                                                                                                                   | 86      |
| 13                                                                                                                       | or/2-12                                                                                                                                                                                                                                                                                                                                                                                                                                                                                                                    | 99543   |
| 14                                                                                                                       | Nitric Oxide/                                                                                                                                                                                                                                                                                                                                                                                                                                                                                                              | 78284   |
| 15                                                                                                                       | (feno and (fraction* or exhal* or nitric)).tw,kf.                                                                                                                                                                                                                                                                                                                                                                                                                                                                          | 1099    |
| 16                                                                                                                       | (fe no and (fraction* or exhal* or nitric)).tw,kf.                                                                                                                                                                                                                                                                                                                                                                                                                                                                         | 401     |
| 17                                                                                                                       | nitric oxid*.tw,kf.                                                                                                                                                                                                                                                                                                                                                                                                                                                                                                        | 126245  |
| 18                                                                                                                       | or/14-17                                                                                                                                                                                                                                                                                                                                                                                                                                                                                                                   | 140975  |
| 19                                                                                                                       | 13 and 18                                                                                                                                                                                                                                                                                                                                                                                                                                                                                                                  | 750     |
| 20                                                                                                                       | 1 and 19                                                                                                                                                                                                                                                                                                                                                                                                                                                                                                                   | 32      |
| 21                                                                                                                       | 1 not 20                                                                                                                                                                                                                                                                                                                                                                                                                                                                                                                   | 4       |

## Embase via OvidSP

| Embase Classic+Embase 1947 to 2016 June 28 |                                                                            |         |
|--------------------------------------------|----------------------------------------------------------------------------|---------|
| #                                          | Searches                                                                   | Results |
|                                            |                                                                            |         |
| 1                                          | chronic obstructive lung disease/                                          | 90816   |
| 2                                          | chronic bronchitis/                                                        | 13971   |
| 3                                          | exp lung emphysema/                                                        | 25119   |
| 4                                          | obstructive airway disease/                                                | 1876    |
| 5                                          | bronchus obstruction/                                                      | 4097    |
| 6                                          | airway obstruction/                                                        | 30149   |
| 7                                          | (obstructive adj2 (pulmonary or lung\$ or respirat\$ or air\$)).tw.        | 62353   |
| 8                                          | (chronic air\$ adj2 (obstruction\$ or limitation\$ or occlusion\$)).tw.    | 1831    |
| 9                                          | (chronic bronch\$ adj2 (obstruction\$ or limitation\$ or occlusion\$)).tw. | 159     |
| 10                                         | (chronic\$ adj2 bronch\$).tw.                                              | 20615   |
| 11                                         | COPD.tw.                                                                   | 58043   |
| 12                                         | COAD.tw.                                                                   | 292     |
| 13                                         | emphysema\$.tw.                                                            | 37016   |
| 14                                         | (acos and asthm*).tw.                                                      | 128     |
| 15                                         | 1 or 2 or 3 or 4 or 5 or 6 or 7 or 8 or 9 or 10 or 11 or 12 or 13 or 14    | 202126  |
| 16                                         | nitric oxide/                                                              | 131877  |
| 17                                         | (feno and (fraction* or exhal* or nitric)).tw.                             | 2503    |
| 18                                         | ((fe adj no) and (fraction* or exhal* or nitric)).tw.                      | 261     |
| 19                                         | nitric oxid*.tw.                                                           | 150577  |
| 20                                         | 16 or 17 or 18 or 19                                                       | 184366  |
| 21                                         | 15 and 20                                                                  | 2049    |
| 22                                         | remove duplicates from 21                                                  | 2024    |
| 23                                         | from 22 keep 1-1000                                                        | 1000    |
| 24                                         | from 22 keep 1001-2000                                                     | 1000    |
| 25                                         | from 22 keep 2001-2024                                                     | 24      |

**CINAHL via EBSCOhost**

| #   | Query                                                                                                                                              | Results |
|-----|----------------------------------------------------------------------------------------------------------------------------------------------------|---------|
| S19 | S13 AND S18                                                                                                                                        | 158     |
| S18 | S14 OR S15 OR S16 OR S17                                                                                                                           | 9,826   |
| S17 | TI nitric oxid* OR AB nitric oxid*                                                                                                                 | 7,415   |
| S16 | TI ( (fe N1 no and (fraction* or exhal* or nitric)) ) OR AB ( (fe N1 no and (fraction* or exhal* or nitric)) )                                     | 44      |
| S15 | TI ( (feno and (fraction* or exhal* or nitric)) ) OR AB ( (feno and (fraction* or exhal* or nitric)) )                                             | 157     |
| S14 | (MH "Nitric Oxide")                                                                                                                                | 6,342   |
| S13 | S1 OR S2 OR S3 OR S4 OR S5 OR S6 OR S7 OR S8 OR S9 OR S10 OR S11 OR S12                                                                            | 25,637  |
| S12 | TI ( (acos and asthm*) ) OR AB ( (acos and asthm*) )                                                                                               | 12      |
| S11 | TI emphysema* OR AB emphysema*                                                                                                                     | 2,329   |
| S10 | TI COAD OR AB COAD                                                                                                                                 | 24      |
| S9  | TI COPD OR AB COPD                                                                                                                                 | 9,032   |
| S8  | TI chronic* N2 bronch* OR AB chronic* N2 bronch*                                                                                                   | 936     |
| S7  | TI ( "chronic bronch*" N2 (obstruction* OR limitation* OR occlusion*) ) OR AB ( "chronic bronch*" N2 (obstruction* OR limitation* OR occlusion*) ) | 12      |
| S6  | TI ( "chronic air*" N2 (obstruction* OR limitation* OR occlusion*) ) OR AB ( "chronic air*" N2 (obstruction* OR limitation* OR occlusion*) )       | 136     |
| S5  | TI ( obstructive N2 (pulmonary OR lung* OR respirat* OR air*) ) OR AB ( obstructive N2 (pulmonary OR lung* OR respirat* OR air*) )                 | 9,228   |
| S4  | MH "Emphysema+"                                                                                                                                    | 2,522   |
| S3  | (MH "Respiratory Tract Diseases")                                                                                                                  | 3,304   |
| S2  | (MH "Lung Diseases, Obstructive")                                                                                                                  | 3,603   |
| S1  | MH "Pulmonary Disease, Chronic Obstructive+"                                                                                                       | 12,513  |

**Cochrane Library via Wiley Online**

| ID  | Search                                                                          | Hits  |
|-----|---------------------------------------------------------------------------------|-------|
| #1  | (obstructive near/2 (pulmonary or lung* or respirat* or air*)):ti,ab,kw         | 7664  |
| #2  | ("chronic air*" near/2 (obstruction* or limitation* or occlusion*)):ti,ab,kw    | 286   |
| #3  | ("chronic bronch*" near/2 (obstruction* or limitation* or occlusion*)):ti,ab,kw | 16    |
| #4  | (chronic* near/2 bronch*):ti,ab,kw                                              | 2028  |
| #5  | COAD:ti,ab,kw                                                                   | 47    |
| #6  | COPD:ti,ab,kw                                                                   | 8954  |
| #7  | emphysema*:ti,ab,kw                                                             | 909   |
| #8  | acos:ti,ab,kw and asthm*:ti,ab,kw                                               | 2     |
| #9  | #1 or #2 or #3 or #4 or #5 or #6 or #7 or #8                                    | 14399 |
| #10 | feno:ti,ab,kw and (fraction* or exhal* or nitric):ti,ab,kw                      | 189   |
| #11 | (fe N1 no):ti,ab,kw and (fraction* or exhal* or nitric):ti,ab,kw                | 0     |
| #12 | nitric oxid*:ti,ab,kw                                                           | 4652  |
| #13 | #10 or #11 or #12                                                               | 4661  |
| #14 | #9 and #13                                                                      | 91    |

Cochrane Reviews (2)

Trials (89)

## Web of Science

| Indexes=SCI-EXPANDED, SSCI, A&HCI, CPCI-S, CPCI-SSH, ESCI Timespan=All years |                                                                            |         |
|------------------------------------------------------------------------------|----------------------------------------------------------------------------|---------|
| SET                                                                          | QUERY                                                                      | RESULTS |
| # 14                                                                         | #13 AND #9                                                                 | 1,649   |
| # 13                                                                         | #12 OR #11 OR #10                                                          | 253,849 |
| # 12                                                                         | TS= (nitric oxid*)                                                         | 253,810 |
| # 11                                                                         | TS= ("fe no" and (fraction* or exhal* or nitric))                          | 467     |
| # 10                                                                         | TS= (feno and (fraction* or exhal* or nitric))                             | 1,312   |
| # 9                                                                          | #8 OR #7 OR #6 OR #5 OR #4 OR #3 OR #2 OR #1                               | 86,412  |
| # 8                                                                          | TS= (acos and asthm*)                                                      | 66      |
| # 7                                                                          | TS= (emphysema*)                                                           | 20,414  |
| # 6                                                                          | TS= (COAD)                                                                 | 400     |
| # 5                                                                          | TS= (COPD)                                                                 | 35,923  |
| # 4                                                                          | TS= (chronic* NEAR/2 bronch*)                                              | 11,628  |
| # 3                                                                          | TS= ("chronic bronch*" NEAR/2 (obstruction* or limitation* or occlusion*)) | 214     |
| # 2                                                                          | TS= ("chronic air*" NEAR/2 (obstruction* or limitation* or occlusion*))    | 1,392   |
| # 1                                                                          | TS= (obstructive NEAR/2 (pulmonary or lung* or respirat* or air*))         | 52,025  |

**BIOSIS Previews, BIOSIS Previews Archive**

| #  | Searches                                                                         | Results |
|----|----------------------------------------------------------------------------------|---------|
|    |                                                                                  |         |
| 1  | (obstructive adj2 (pulmonary or lung\$ or respirat\$ or air\$)).ti,ab,mi.        | 29808   |
| 2  | (chronic air\$ adj2 (obstruction\$ or limitation\$ or occlusion\$)).ti,ab,mi.    | 1451    |
| 3  | (chronic bronch\$ adj2 (obstruction\$ or limitation\$ or occlusion\$)).ti,ab,mi. | 85      |
| 4  | (chronic\$ adj2 bronch\$).ti,ab,mi.                                              | 10463   |
| 5  | COPD.ti,ab,mi.                                                                   | 16994   |
| 6  | COAD.ti,ab,mi.                                                                   | 176     |
| 7  | emphysema\$.ti,ab,mi.                                                            | 15763   |
| 8  | (acos and asthm*).ti,ab,mi.                                                      | 17      |
| 9  | or/1-8                                                                           | 56423   |
| 10 | (feno and (fraction* or exhal* or nitric)).ti,ab,mi.                             | 701     |
| 11 | (fe no and (fraction* or exhal* or nitric)).ti,ab,mi.                            | 128     |
| 12 | nitric oxid*.ti,ab,mi.                                                           | 151002  |
| 13 | or/10-12                                                                         | 151048  |
| 14 | 9 and 13                                                                         | 486     |

### Removal of duplicates

|                     | Records after<br>Medline and/or<br>Embase AN<br>Removal | Au-Yr-Ti-<br>Jo-VI-Is-Pg | Au-Yr-Ti | Au-Yr-Jo | Yr-Ti-Jo | Ti-Jo-VI | Ti-Is | Au-Yr-Is |
|---------------------|---------------------------------------------------------|--------------------------|----------|----------|----------|----------|-------|----------|
| Biosis<br>articles  | 486                                                     | 258                      | 150      | 142      | 87       | 74       | 70    | 70       |
| CINAHL              | 158                                                     | 158                      | 83       | 77       | 54       | 53       | 51    | 51       |
| Cochrane            | 91                                                      | 90                       | 89       | 89       | 88       | 88       | 88    | 55       |
| Embase<br>articles  | 2024                                                    | 1964                     | 1558     | 1489     | 1443     | 1442     | 1422  | 1366     |
| Medline<br>articles | 750                                                     | 738                      | 738      | 738      | 738      | 737      | 737   | 735      |
| WoS articles        | 1649                                                    | 1285                     | 1129     | 1096     | 1031     | 1030     | 1019  | 1014     |
| Sum                 | 5158                                                    |                          |          |          |          |          |       | 3291     |
