# Supplementary material
Source: publisher figshare collection journal article supplement (https://tandf.figshare.com/articles/dataset/_/7010363)
Supplement: Supplementary file 1 [file 2 › icop_a_1485637_sm8887.pdf]

# Study Characteristics and Key Findings

**Table S1. Study Characteristics and Key Findings\***

| Author(s)<br>(Year)                       | Title                                                                                             | Country   | Study type/intervention<br>(if applicable) | Measurement                                                                                                                             | Setting/Sample                                                                                                                    | Key findings, including N analyzed<br>if different from N in sample**                                                                                                                                                                                                                                                                                                                                                                                                                                                                         |
|-------------------------------------------|---------------------------------------------------------------------------------------------------|-----------|--------------------------------------------|-----------------------------------------------------------------------------------------------------------------------------------------|-----------------------------------------------------------------------------------------------------------------------------------|-----------------------------------------------------------------------------------------------------------------------------------------------------------------------------------------------------------------------------------------------------------------------------------------------------------------------------------------------------------------------------------------------------------------------------------------------------------------------------------------------------------------------------------------------|
| <b>Bhowmik et al. (2005) (1)</b>          | Effects of exacerbations and seasonality on exhaled nitric oxide in COPD                          | UK        | Prospective cohort study                   | $F_{ENO}$ was measured using a chemiluminescence analyzer (Model LR 2000; Logan Research, Rochester, UK).                               | N=98, COPD patients included in this study were volunteers from the outpatient clinics at the London Chest Hospital (London, UK). | N=79 (Nineteen patients could not perform an adequate baseline exhalation: they were older and with lower FEV1 and FVC)<br>Lower $F_{ENO}$ in current smokers than non-smokers.<br>No association between $F_{ENO}$ with FEV1, FVC or exacerbation frequency<br>No significant difference between patients who took ICS and/or inhaled long-acting beta-agonist and who not (n=8, n=19 respectively)<br>Higher level of $F_{ENO}$ from October to December perhaps due to viral infection<br>Higher levels of $F_{ENO}$ in exacerbation, N=38 |
| <b>Foschino Barbaro et al. (2007) (2)</b> | Inflammation, oxidative stress and systemic effects in mild chronic obstructive pulmonary disease | Italy     | Not mentioned                              | $F_{ENO45}$ was measured using a rapid-response chemiluminescence NO analyzer (model 280; Sievers Instruments; Boulder, Colorado, USA). | N=27 mild stable ex-smoker COPD, N=15 healthy smoker were recruited from the Respiratory Disease Institute, University of Foggia. | Higher $F_{ENO45}$ in COPD patients compared to control subjects and in reversible compared to non-reversible COPD<br>COPD patients with airway reversibility showed increased sputum eosinophils and exhaled NO                                                                                                                                                                                                                                                                                                                              |
| <b>Liu et al. (2007) (3)</b>              | Nitric Oxide and Exhaled Breath Nitrite/Nitrates in Chronic                                       | Australia | Cross-sectional                            | $F_{ENO}$ was measured offline by using a closed circuit which was connected to a                                                       | N=96 COPD and N=80 healthy subjects were recruited from the community,                                                            | No effect of smoking status (even in control group) or glucocorticosteroid (GCS) treatment on $F_{ENO}$ levels in COPD patients                                                                                                                                                                                                                                                                                                                                                                                                               |

## Study Characteristics and Key Findings

|                                        |                                                                                                                                                                                  |       |                                                                               |                                                                                                                                                                               |                                                                                                                                                |                                                                                                                                                                                                                                                                                                                                                                                                                                                                                                                                         |
|----------------------------------------|----------------------------------------------------------------------------------------------------------------------------------------------------------------------------------|-------|-------------------------------------------------------------------------------|-------------------------------------------------------------------------------------------------------------------------------------------------------------------------------|------------------------------------------------------------------------------------------------------------------------------------------------|-----------------------------------------------------------------------------------------------------------------------------------------------------------------------------------------------------------------------------------------------------------------------------------------------------------------------------------------------------------------------------------------------------------------------------------------------------------------------------------------------------------------------------------------|
|                                        | Obstructive Pulmonary Disease Patients                                                                                                                                           |       |                                                                               | chemiluminescent NO analyzer for NO determinations (Dasibi Environmental Corp., Glendale, Calif., USA).                                                                       | including hospital staff and their friends, and the respiratory outpatient clinics of the Prince of Wales Hospital and St. Vincent's Hospital. | Higher $F_{\text{ENO}}$ levels in COPD patients than normal subjects                                                                                                                                                                                                                                                                                                                                                                                                                                                                    |
| <b>de Laurentiis et al. (2008) (4)</b> | Exhaled nitric oxide monitoring in COPD using a portable analyzer                                                                                                                | Italy | Cohort, Prospective                                                           | $F_{\text{ENO50}}$ was measured using electrochemical $F_{\text{ENO50}}$ device (NIOX MINO, Aerocrine, Sweden) and the chemiluminescence analyzer (NOA, Sensormedics, Italy). | N=59 COPD patients visiting department as outpatients                                                                                          | Higher mean coefficient of variability (CoV) $F_{\text{ENO50}}$ in COPD than healthy group<br>Lower $F_{\text{ENO50}}$ levels in COPD current smokers than COPD ex-smoker<br>No association between $F_{\text{ENO50}}$ and FEV1<br>Significant association between individual exacerbations and $F_{\text{ENO50}}$                                                                                                                                                                                                                      |
| <b>Kunisaki et al. (2008) (5)</b>      | Exhaled nitric oxide, systemic inflammation, and the spirometric response to inhaled fluticasone propionate in severe chronic obstructive pulmonary disease: A prospective study | USA   | A single-arm, open-label prospective study/Salmeterol, fluticasone propionate | $F_{\text{ENO50}}$ was measured online (real-time) with a chemiluminescence device (Sievers NOA 280i, GE Analytical Instruments, Boulder, CO).                                | N=73 ex-smoker severe COPD were recruited from the Minneapolis Veterans Affairs Medical Center.                                                | N=60 (Thirteen subjects were withdrawn: they were similar in COPD severity but used more medications (antibiotics, prednisolone, inhaled corticosteroid before study participation)).<br>No association between baseline (pre-ICS) $F_{\text{ENO50}}$ with FEV1 or FVC<br>$F_{\text{ENO50}}$ significantly decreased after four weeks of ICS therapy.<br>Significant difference in baseline $F_{\text{ENO50}}$ levels between ICS responders and non-responders, higher baseline $F_{\text{ENO50}}$ levels compared with non-responders |

## Study Characteristics and Key Findings

|                                 |                                                                                                        |              |                                                                               |                                                                                                            |                                                                                                                                                                                         |                                                                                                                                                                                                                                                                                                                                                                                                                                                                                    |
|---------------------------------|--------------------------------------------------------------------------------------------------------|--------------|-------------------------------------------------------------------------------|------------------------------------------------------------------------------------------------------------|-----------------------------------------------------------------------------------------------------------------------------------------------------------------------------------------|------------------------------------------------------------------------------------------------------------------------------------------------------------------------------------------------------------------------------------------------------------------------------------------------------------------------------------------------------------------------------------------------------------------------------------------------------------------------------------|
| <b>Beg et al. (2009) (6)</b>    | Exhaled Nitric Oxide in Chronic Obstructive Pulmonary Disease                                          | Saudi Arabia | Cross-sectional                                                               | $F_{\text{ENO50}}$ was measured using NOX EVA 4000 chemiluminescence analyzer (SERES-FRANCE).              | N=14 COPD ex-smokers, N=25 patients with bronchial/naïve steroid asthma, and N=25 healthy recruited from pulmonary clinic at the King Khalid University Hospital, Riyadh, Saudi Arabia. | Significant higher $F_{\text{ENO50}}$ in COPD patients than healthy<br>Negative association between FEV1/FVC and the $F_{\text{ENO50}}$ levels among COPD patients                                                                                                                                                                                                                                                                                                                 |
| <b>Roy et al. (2009) (7)</b>    | COPD phenotype description using principal components analysis                                         | UK           | Single study visit                                                            | $F_{\text{ENO50}}$ was measured using Niox chemiluminescence on-line analyzer (Aerocrine, Solna, Sweden).  | N=127 COPD patients were recruited from primary care by media advertising.                                                                                                              | Significant association between $F_{\text{ENO50}}$ and sputum eosinophils, regardless of whether the data were expressed as percentage differential or cell count.<br>Lower levels of $F_{\text{ENO50}}$ in COPD smokers and women                                                                                                                                                                                                                                                 |
| <b>Dummer et al. (2009) (8)</b> | Predicting Corticosteroid Response in Chronic Obstructive Pulmonary Disease Using Exhaled Nitric Oxide | New Zealand  | Randomized double-blind, placebo-controlled, crossover trial/ Oral Prednisone | $F_{\text{ENO50}}$ was measured using an on-line chemiluminescence analyzer (Aerocrine AB, Solna, Sweden). | N=82 COPD patients were recruited from the research database and respiratory clinics.                                                                                                   | N=62 (Thirteen patients were symptomatic after withdrawal of ICS, 2 had a too busy schedule to continue, 1 performed inadequate $F_{\text{ENO50}}$ technique, and 1 had an unrelated illness, 2 patients were excluded because of nonadherence and 1 was excluded because of a new diagnosis of angina).<br>$F_{\text{ENO50}}$ decreased after prednisone in the case group.<br>A significant association between off-steroid $F_{\text{ENO50}}$ and sputum eosinophil percentage. |

## Study Characteristics and Key Findings

|                                                                                                                                                                                                                                                                                                                                                                                                                                                                                                |                                                                                                     |         |                    |                                                                                                                   |                                                                                                                                                     |                                                                                                                                                                                                                                                                                                                                                                                                                                                                                                                                                                                                                                                                                                                                                                                                                         |
|------------------------------------------------------------------------------------------------------------------------------------------------------------------------------------------------------------------------------------------------------------------------------------------------------------------------------------------------------------------------------------------------------------------------------------------------------------------------------------------------|-----------------------------------------------------------------------------------------------------|---------|--------------------|-------------------------------------------------------------------------------------------------------------------|-----------------------------------------------------------------------------------------------------------------------------------------------------|-------------------------------------------------------------------------------------------------------------------------------------------------------------------------------------------------------------------------------------------------------------------------------------------------------------------------------------------------------------------------------------------------------------------------------------------------------------------------------------------------------------------------------------------------------------------------------------------------------------------------------------------------------------------------------------------------------------------------------------------------------------------------------------------------------------------------|
| <p>Significant association between baseline <math>F_{\text{ENO50}}</math> and the FEV1</p> <p>A significant improvement in FEV1 from the lowest to the highest <math>F_{\text{ENO50}}</math> tertile</p> <p>There was a significant predictive value of baseline <math>F_{\text{ENO50}}</math> for an increase of 0.2 L in FEV1 with prednisone with an optimum <math>F_{\text{ENO50}}</math> cut-point of 50 ppb, area under the curve (AUC) 0.69, sensitivity 29%, and specificity 96%).</p> |                                                                                                     |         |                    |                                                                                                                   |                                                                                                                                                     |                                                                                                                                                                                                                                                                                                                                                                                                                                                                                                                                                                                                                                                                                                                                                                                                                         |
| <b>Antus et al. (2010) (9)</b>                                                                                                                                                                                                                                                                                                                                                                                                                                                                 | Relationship between exhaled nitric oxide and treatment response in COPD patients with exacerbation | Hungary | Longitudinal study | $F_{\text{ENO50}}$ was measured using a chemiluminescence analyzer (Model LR2000, Logan Research, Rochester, UK). | N=58 COPD patients with exacerbations referred to the 3rd Pulmonary Department at National Koranyi Institute for TB and Pulmonology were recruited. | <p>Lower <math>F_{\text{ENO50}}</math> levels in smokers at admission compared with ex-smokers</p> <p>Reduced <math>F_{\text{ENO50}}</math> levels in patients receiving ICS therapy compared with those not taking ICS at admission</p> <p>Similar <math>F_{\text{ENO50}}</math> level in men and women</p> <p>Significant positive association between <math>F_{\text{ENO50}}</math> levels at admission and the post-treatment increases in FEV1 and FEV1% predicted</p> <p>No association between an increase in FVC and <math>F_{\text{ENO50}}</math> levels at admission or with changes in <math>F_{\text{ENO50}}</math> levels</p> <p><math>F_{\text{ENO50}}</math> was a good anticipator of a significant post-treatment increase in FEV1.</p> <p>The optimum cut point for <math>F_{\text{ENO50}}</math></p> |

## Study Characteristics and Key Findings

|                                    |                                                                                                          |         |               |                                                                                                      |                                                                                                                                                                                                                                                                     |                                                                                                                                                                                                                                                                                                                                                                                                                                                                                                                                       |
|------------------------------------|----------------------------------------------------------------------------------------------------------|---------|---------------|------------------------------------------------------------------------------------------------------|---------------------------------------------------------------------------------------------------------------------------------------------------------------------------------------------------------------------------------------------------------------------|---------------------------------------------------------------------------------------------------------------------------------------------------------------------------------------------------------------------------------------------------------------------------------------------------------------------------------------------------------------------------------------------------------------------------------------------------------------------------------------------------------------------------------------|
|                                    |                                                                                                          |         |               |                                                                                                      |                                                                                                                                                                                                                                                                     | was 26.8 ppb with the sensitivity and specificity of 74 and 75%, respectively with the area under the ROC curve of 0.82.<br>FEV1 and FEV1% predicted increased significantly at discharge in the group with high $F_{\text{ENO50}}$ levels (> 26.8 ppb) (n = 24).                                                                                                                                                                                                                                                                     |
| <b>Lehouck et al. (2010) (10)</b>  | Alveolar and bronchial exhaled nitric oxide in chronic obstructive pulmonary disease                     | Belgium | Case-control  | Exhaled NO was measured by a chemiluminescence analyzer (NIOX Flex; AerocrineAB, Stockholm, Sweden). | N=28 healthy ex-smokers, N=39 healthy smokers, N=55 COPD ex-smokers, and N=29 COPD smokers were recruited during the stable clinical conditions from the neighborhood Leuven(Belgium) via the service of Respiratory Medicine at the University Hospital of Leuven. | No significant difference in $F_{\text{ENO50}}$ levels between COPD patients and age-matched healthy control<br>Significant reduced $F_{\text{ENO50}}$ in both current smoker COPD patients and healthy controls<br>No significant difference in $F_{\text{ENO50}}$ levels between the GOLD stages<br>No significant association between FEV1 and $F_{\text{ENO50}}$<br>No significant difference in $F_{\text{ENO50}}$ and use of ICS (39% of COPD patients)<br>No association between $F_{\text{ENO50}}$ value measurements and age |
| <b>Tilemann et al. (2011) (11)</b> | Differences between local and systemic inflammatory markers in patients with obstructive airways disease | Germany | Not mentioned | $F_{\text{ENO50}}$ was measured using a NioxMino® analyzer (Aerocrine AG, Solna, Sweden).            | N=86 asthmatics, N=36 COPD, N=13 subjects with partial reversibility, and N=75 subjects with no obstructive airway diseases from adults presenting to their general practitioners                                                                                   | Higher level of $F_{\text{ENO50}}$ in current non-smokers (never smokers and ex-smokers) than in current smokers<br>Significant lower level of $F_{\text{ENO50}}$ in COPD patients compared to subjects with no airway obstruction<br>Association between $F_{\text{ENO50}}$ with blood eosinophils and IgE levels                                                                                                                                                                                                                    |

## Study Characteristics and Key Findings

|                                    |                                                                                            |         |                                                         |                                                                                                                                                                    |                                                                                                                                                                                                                                                                                             |                                                                                                                                                                                                                                                                                                                                                                            |
|------------------------------------|--------------------------------------------------------------------------------------------|---------|---------------------------------------------------------|--------------------------------------------------------------------------------------------------------------------------------------------------------------------|---------------------------------------------------------------------------------------------------------------------------------------------------------------------------------------------------------------------------------------------------------------------------------------------|----------------------------------------------------------------------------------------------------------------------------------------------------------------------------------------------------------------------------------------------------------------------------------------------------------------------------------------------------------------------------|
|                                    |                                                                                            |         |                                                         |                                                                                                                                                                    | for the first time with complaints suggestive of obstructive airway disease were consecutively included.                                                                                                                                                                                    |                                                                                                                                                                                                                                                                                                                                                                            |
| <b>Rouhos et al. (2011) (12)</b>   | Repeatability of exhaled nitric oxide measurements in patients with COPD                   | Finland | Not mentioned                                           | $F_{\text{ENO}50}$ was measured using chemiluminescence analyzer (Sievers 270B, Boulder, CO, USA) by using computer software specially developed for this purpose. | N=20 COPD patients were recruited from the outpatient department of the Division of Respiratory Diseases and from the Research Unit for Respiratory Diseases of the Helsinki University Central Hospital, N=20 healthy subjects were recruited from the hospital staff and their relatives. | N=19 COPD (One subject was unable to perform acceptable $F_{\text{ENO}50}$ measure), N=18 for $F_{\text{ENO}}$ measurement (one subject did not return for second study day). Higher $F_{\text{ENO}50}$ at baseline in COPD patients than healthy subjects<br>Higher $F_{\text{ENO}50}$ in both COPD and healthy subjects when the subjects did not use sodium bicarbonate |
| <b>Bazeghi et al. (2011) (13)</b>  | Exhaled nitric oxide measure using multiple flows in clinically relevant subgroups of COPD | Denmark | Cohort database study, ECLIPES substudy                 | $F_{\text{ENO}}$ was measured using a Niox chemiluminescence online analyzer (Aerocrine, Solna, Sweden).                                                           | N=91 COPD recruited for the ECLIPSE study. (ECLIPSE substudy, using data of ECLIPSE database).                                                                                                                                                                                              | Significant lower $F_{\text{ENO}}$ levels in active smokers than in ex-smokers                                                                                                                                                                                                                                                                                             |
| <b>Akamatsu et al. (2011) (14)</b> | Improvement of air flow limitation by                                                      | Japan   | Not mentioned/<br>Fluticasone (FP),<br>Salmeterol (SAL) | $F_{\text{ENO}50}$ was measured using a chemiluminescence                                                                                                          | N=14 stable COPD patients receiving long-acting                                                                                                                                                                                                                                             | Significant decrease in $F_{\text{ENO}50}$ levels by the treatment with FP/SAL<br>No association between the baseline                                                                                                                                                                                                                                                      |

## Study Characteristics and Key Findings

|                                 |                                                                                                                    |         |                           |                                                                                                                                                   |                                                                                                                                                                           |                                                                                                                                                                                                                                                                                                                                                                                                                                |
|---------------------------------|--------------------------------------------------------------------------------------------------------------------|---------|---------------------------|---------------------------------------------------------------------------------------------------------------------------------------------------|---------------------------------------------------------------------------------------------------------------------------------------------------------------------------|--------------------------------------------------------------------------------------------------------------------------------------------------------------------------------------------------------------------------------------------------------------------------------------------------------------------------------------------------------------------------------------------------------------------------------|
|                                 | fluticasone propionate/salmeterol in chronic obstructive pulmonary disease: what is the specific marker?           |         |                           | analyzer (modified NA-623N®; Chest, Inc., Tokyo, Japan).                                                                                          | muscarinic receptor antagonist(tiotropium 18µg/day) were consecutively enrolled from the outpatient clinic of Wakayama Medical University Hospital.                       | $F_{\text{ENO50}}$ level and the changes in FEV1 as well as other pulmonary physiological parameters<br>To identify subjects with significant improvement in FEV1, a baseline $F_{\text{ENO50}}$ level >35 ppb is useful with the sensitivity of 80 and specificity of 66.7%.<br>Improvement in FEV1 by adding treatment of FP/SAL in COPD subjects with $F_{\text{ENO50}}$ >35 ppb                                            |
| <b>Antus et al. (2013) (15)</b> | Relationship between exhaled nitric oxide and the frequency of severe acute exacerbation of COPD: 3-year follow-up | Hungary | Retrospective pilot study | Levels of $F_{\text{ENO50}}$ were recorded using a chemiluminescence analyzer (Model LR2000, Logan Research Rochester, UK) at hospital admission. | N=58 COPD patients referred to the National Korányi Institute of TB and Pulmonology with an acute exacerbation of the disease were recruited.                             | No association between $F_{\text{ENO50}}$ and inhaled corticosteroid (ICS), long-acting $\beta$ 2-agonist (LABA) and long-acting muscarinic agonist (LAMA) therapy on $F_{\text{ENO50}}$<br>More exacerbations in COPD patients with low $F_{\text{ENO50}}$ level<br>Administering antibiotics 18% more frequently in COPD subjects with low $F_{\text{ENO50}}$ level than subjects in the high $F_{\text{ENO50}}$ level group |
| <b>Soter et al. (2013) (16)</b> | Predicting Sputum Eosinophilia in Exacerbations of COPD using Exhaled Nitric Oxide                                 | Hungary | Prospective study         | $F_{\text{ENO50}}$ was measured using a chemiluminescence analyzer (Model LR2500, Logan Research, Rochester, UK).                                 | N=49 COPD patients referred to the National Koranyi Institute of TB and Pulmonology with an acute exacerbation of the disease were recruited consecutively for the study. | $F_{\text{ENO50}}$ cut point: 26.8 parts per billion (ppb) was used for the estimation of the treatment response. Patients with $F_{\text{ENO50}}$ levels of >26.8 ppb had a greater increase in FEV1 compared to those with $F_{\text{ENO50}}$ levels of <26.8 ppb at admission<br>Significant association between the percentage/number of sputum eosinophils and $F_{\text{ENO50}}$ levels, both at                         |

## Study Characteristics and Key Findings

|                                   |                                                                                                                           |       |                                                                             |                                                                                                                |                                                                                                                                                                                                        |                                                                                                                                                                                                                                                                                                                                                                                                                                                                                  |
|-----------------------------------|---------------------------------------------------------------------------------------------------------------------------|-------|-----------------------------------------------------------------------------|----------------------------------------------------------------------------------------------------------------|--------------------------------------------------------------------------------------------------------------------------------------------------------------------------------------------------------|----------------------------------------------------------------------------------------------------------------------------------------------------------------------------------------------------------------------------------------------------------------------------------------------------------------------------------------------------------------------------------------------------------------------------------------------------------------------------------|
|                                   |                                                                                                                           |       |                                                                             |                                                                                                                |                                                                                                                                                                                                        | exacerbation and discharge<br>To identify sputum eosinophilia in COPD patients with acute exacerbations, the optimum cut point of 19 ppb with AUC of 0.089 and sensitivity of 90% and specificity of 74% is useful.                                                                                                                                                                                                                                                              |
| <b>Donohue et al. (2014) (17)</b> | Characterization of airway inflammation in patients with COPD using fractional exhaled nitric oxide levels: a pilot study | USA   | A pilot, observational (no treatment allocation), multicenter, single-visit | $F_{\text{ENO}50}$ was measured using $F_{\text{ENO}50}$ analyzer (NIOX MINO®; AerocrineAB).                   | N=200 COPD outpatients aged 40 years and older were recruited at two sites within the University of North Carolina, Chapel Hill, North Carolina, Department of Respiratory and Critical Care Medicine. | N=191(Nine patients were excluded due to inability to perform $F_{\text{ENO}50}$ and/or spirometry or having asthma without COPD).<br>Increased $F_{\text{ENO}50}$ level in COPD patients<br>No association between $F_{\text{ENO}50}$ levels and GOLD stages (I-IV)                                                                                                                                                                                                             |
| <b>Xia et al. (2014) (18)</b>     | Fractional exhaled nitric oxide in bronchial inflammatory lung diseases                                                   | China | Not mentioned                                                               | $F_{\text{ENO}50}$ was measured using SV-02 NO Instrument made in Wuxi Shangwo Biological Technology Co., Ltd. | N=38 COPD, N=57 suspected asthmatics, N=26 healthy subjects were recruited from those who had an outpatient visit at Central South University, Xiangya Hospital.                                       | Significant higher level of $F_{\text{ENO}50}$ in COPD patients than healthy subjects<br>Significant higher level of $F_{\text{ENO}50}$ in COPD patients with exacerbations (N=25) compared to stable COPD subjects (N=13)<br>No association between $F_{\text{ENO}50}$ with FEV1 and FEV1/FVC level in COPD patients<br>Higher $F_{\text{ENO}50}$ levels in smoking group (N=29) than non-smoker (N=34) (Mix subjects: stable COPD (N=13), healthy (N=26), non-asthmatic (N=24) |

## Study Characteristics and Key Findings

|                                  |                                                                                                                                      |        |                                    |                                                                                                |                                                                                                                                                                                                                                                                                                                                              |                                                                                                                                                                                                                                                                                                                                                  |
|----------------------------------|--------------------------------------------------------------------------------------------------------------------------------------|--------|------------------------------------|------------------------------------------------------------------------------------------------|----------------------------------------------------------------------------------------------------------------------------------------------------------------------------------------------------------------------------------------------------------------------------------------------------------------------------------------------|--------------------------------------------------------------------------------------------------------------------------------------------------------------------------------------------------------------------------------------------------------------------------------------------------------------------------------------------------|
| <b>Rawy et al. (2015) (19)</b>   | Fraction of exhaled nitric oxide measurement as a biomarker in asthma and COPD compared with local and systemic inflammatory markers | Egypt  | Not mentioned                      | $F_{\text{ENO50}}$ was measured using Niox Mino analyzer (Aerocrine AG, Solna, Sweden).        | N=60 COPD, N=90 asthmatic, and N=30 control group with no airway obstruction were recruited from attended the pulmonary outpatient clinic.                                                                                                                                                                                                   | Positive association between $F_{\text{ENO50}}$ with sputum and blood eosinophil percentage<br>Negative association between $F_{\text{ENO50}}$ and age<br>No association between $F_{\text{ENO50}}$ and FEV1/FVC                                                                                                                                 |
| <b>Tamada et al. (2015) (20)</b> | Biomarker-based detection of asthma-COPD overlap syndrome in COPD populations                                                        | Japan  | Multicenter, cross-sectional study | $F_{\text{ENO50}}$ was measured using the NIOX MINO® device (Aerocrine, Morrisville, NC, USA). | N=331 COPD outpatients were enrolled from Tohoku University Hospital, Sendai, Japan, and five hospitals (Tohoku University Hospital, Sendai, Japan; NTT East Tohoku Hospital, Sendai, Japan; Wakayama Medical University Hospital, Kimiidera, Japan; Hiraka General Hospital, Yokote, Japan; Iwate Prefectural Isawa Hospital, Oshu, Japan). | High $F_{\text{ENO50}}$ in COPD with asthma-like airway inflammation (ACO) among COPD patients<br>No association between low ( $\leq 35$ ppb) and high $F_{\text{ENO50}}$ ( $> 35$ ppb) levels with pulmonary function tests (FVC, FEV1, and FEV1/FVC).<br>No association between high and low $F_{\text{ENO50}}$ levels with GOLD stages (I-IV) |
| <b>Durmaz et al.</b>             | The role of                                                                                                                          | Turkey | Prospective cohort study           | $F_{\text{nNO5}}$ was measured                                                                 | N=92 COPD patients                                                                                                                                                                                                                                                                                                                           | No significant difference in $F_{\text{nNO5}}$                                                                                                                                                                                                                                                                                                   |

## Study Characteristics and Key Findings

|                                   |                                                                                                                                                                                   |        |                                                                                                                |                                                                                   |                                                                                                                                                                         |                                                                                                                                                                                                                                                                                                                           |
|-----------------------------------|-----------------------------------------------------------------------------------------------------------------------------------------------------------------------------------|--------|----------------------------------------------------------------------------------------------------------------|-----------------------------------------------------------------------------------|-------------------------------------------------------------------------------------------------------------------------------------------------------------------------|---------------------------------------------------------------------------------------------------------------------------------------------------------------------------------------------------------------------------------------------------------------------------------------------------------------------------|
| <b>(2015) (21)†</b>               | nitric oxide in predicting revisit of patients with exacerbated chronic obstructive pulmonary disease                                                                             |        |                                                                                                                | using a hand-held analyzer device (NIOX MINO, Aerocrine, Solna, Sweden).          | presented to the emergency department for the treatment of acute exacerbation                                                                                           | level at presentation or before discharge between the groups                                                                                                                                                                                                                                                              |
| <b>Ishiura et al. (2015) (22)</b> | A comparison of the efficacy of once-daily fluticasone furoate (FF)/vilanterol (VI) with twice-daily fluticasone propionate (FP)/salmeterol (SAL) in asthma-COPD overlap syndrome | Japan  | Randomized, open-label cross-over study/ fluticasone furoate(FF)/vilanterole (VI), fluticasone propionate (FP) | $F_{ENO50}$ was measured using NIOX MINO™, Aerocrine, Stockholm, Sweden.          | N=16 stable ACO                                                                                                                                                         | No significant difference in $F_{ENO50}$ levels, among the run-in, FP/SAL treatment, and FF/VI treatment periods                                                                                                                                                                                                          |
| <b>Chou et al. (2015) (23)</b>    | Exhaled Nitric Oxide Predicts Eosinophilic Airway Inflammation in COPD                                                                                                            | Taiwan | Not mentioned                                                                                                  | $F_{ENO50}$ levels were measured using hand-held analyzer (NIOX MINO, Aerocrine). | N=90 COPD were enrolled from outpatient clinics in Taipei Veterans General Hospital, a tertiary medical center and a university-affiliated teaching hospital in Taiwan. | Higher levels of $F_{ENO50}$ in patients with sputum eosinophilia (N=29) compared to those without eosinophilia (N=61)<br>Significant association between levels of sputum eosinophils, $F_{ENO50}$ , and serum IgE in the COPD patients<br>To predict sputum eosinophilia, use of $F_{ENO50}$ at the cut-off of 23.5 ppb |

## Study Characteristics and Key Findings

|                                             |                                                                                                                                          |       |                                                                                       |                                                                                                                          |                                                                                                                                                                             |                                                                                                                                                                                                                                                                                                                                                                                        |
|---------------------------------------------|------------------------------------------------------------------------------------------------------------------------------------------|-------|---------------------------------------------------------------------------------------|--------------------------------------------------------------------------------------------------------------------------|-----------------------------------------------------------------------------------------------------------------------------------------------------------------------------|----------------------------------------------------------------------------------------------------------------------------------------------------------------------------------------------------------------------------------------------------------------------------------------------------------------------------------------------------------------------------------------|
| <b>Santini et al. (2016) (24)</b>           | Exhaled and non-exhaled non-invasive markers for assessment of respiratory inflammation in patients with stable COPD and healthy smokers | Italy | Multicentre, observational, cross-sectional study                                     | $F_{\text{ENO50}}$ was measured with the NIOX system (Aerocrine, Stockholm, Sweden) with a single breath on-line method. | N=48 stable COPD ex-smokers, N=17 stable COPD current smokers, N=12 healthy current smokers, and N=12 healthy ex-smokers                                                    | with a sensitivity of 62.1 % and a specificity of 70.5 % is useful.<br>N=47 stable COPD ex-smokers<br>Lower $F_{\text{ENO50}}$ levels in COPD current smokers compared to COPD ex-smokers<br>Higher $F_{\text{ENO50}}$ in COPD ex-smoker compared to healthy ex-smoker<br>No difference in $F_{\text{ENO50}}$ values between COPD patients on ICS therapy and those not on ICS therapy |
| <b>Arif et al. (2016) (25)</b>              | Use of Exhaled Nitric Oxide as a Biomarker in Diagnosis and Management of Chronic Obstructive Pulmonary Disease                          | USA   | Secondary data from the National Health and Nutrition Examination Survey 2007 to 2010 | Not mentioned                                                                                                            | N=10214 individuals 30 years or older from the National Health and Nutrition Examination                                                                                    | No association between $F_{\text{ENO50}}$ and COPD or between COPD severity (GOLD stage I-IV) and $F_{\text{ENO50}}$                                                                                                                                                                                                                                                                   |
| <b>Alcazar-Navarrete et al. (2016) (26)</b> | Diagnostic performance of the measurement of nitric oxide in exhaled air in the diagnosis of COPD phenotypes                             | Spain | Cross-sectional observational study                                                   | $F_{\text{ENO50}}$ was measured using chemiluminescence analyzer of nitric oxide (HypAirFeNO®, Medisoft, Belgium)        | N=103 COPD, N=16 healthy nonsmokers, N=30 healthy smokers, and N=43 asthmatics patients who received assistance consecutively in an outpatient pulmonary care facility were | Higher levels of $F_{\text{ENO50}}$ in COPD than non-smoking healthy controls. No differences in $F_{\text{ENO50}}$ levels between the GOLD 2011 groups<br>Significant higher $F_{\text{ENO50}}$ levels in ACO patients (N=22) than other COPD phenotypes (Non-exacerbators, N=34), frequent exacerbators with emphysema (N=13), frequent exacerbators with                            |

## Study Characteristics and Key Findings

|                                      |                                                                                                                                         |             |                                               |                                                                                                         |                                                                                                  |                                                                                                                                                                                                                                                                                                                                                                                                       |
|--------------------------------------|-----------------------------------------------------------------------------------------------------------------------------------------|-------------|-----------------------------------------------|---------------------------------------------------------------------------------------------------------|--------------------------------------------------------------------------------------------------|-------------------------------------------------------------------------------------------------------------------------------------------------------------------------------------------------------------------------------------------------------------------------------------------------------------------------------------------------------------------------------------------------------|
|                                      |                                                                                                                                         |             |                                               |                                                                                                         | enrolled.                                                                                        | chronic bronchitis (N=34))<br>To diagnose ACO, use of 19 ppb as the optimal cut off value of $F_{ENO50}$ with a sensitivity of 0.68 and a, specificity of 0.75 and AUC of 0.79                                                                                                                                                                                                                        |
| <b>Logotheti, et al. (2016) (27)</b> | The role of exhaled nitric oxide in patients with chronic obstructive pulmonary disease undergoing laparotomy surgery-The noxious study | Greece      | A prospective, observational study            | $F_{ENO50}$ measurement using a portable analyzer of nitric oxide (HypAir FeNO®, Medisoft, Belgium)     | N=70 COPD smoker who were scheduled for major abdominal surgeries                                | Higher $F_{ENO50}$ in older COPD patients compared to younger patients<br>Lower $F_{ENO50}$ in COPD patients under ICS than those who were not under ICS<br>Association between GOLD category 2011 (ABCD) and the elevated $F_{ENO50}$<br>Significant increase in exacerbations in COPD patients with elevated $F_{ENO50}$ levels<br>Association between elevated $F_{ENO50}$ and extra hospital care |
| <b>Amer, et al. (2016) (28)</b>      | Effect of Inhaled $\beta_2$ -Agonist on Exhaled Nitric Oxide in Chronic Obstructive Pulmonary Disease                                   | New Zealand | Not mentioned/<br>Salbutamol (bronchodilator) | $F_{ENO50}$ was measured using chemiluminescence nitric oxide analyzer (NOA 280i; Sievers, Boulder, CO) | N=24 stable COPD were recruited.                                                                 | N=21 (Three subjects were not able to do acceptable maneuver).<br>Increased level of $F_{ENO50}$ in COPD subjects after bronchodilator therapy<br>No association between the change in $F_{ENO50}$ and change in FEV1.                                                                                                                                                                                |
| <b>Chen, et al. (2016) (29)</b>      | Importance of fractional exhaled nitric oxide in the differentiation                                                                    | China       | Not mentioned                                 | $F_{ENO50}$ was measured using a NO analyzer (NIOX MINO Analyzer; Aerocrine AB, Solna, Sweden)          | N=132 COPD, N=500 asthmatics, and N=57 ACO visiting the First Affiliated Hospital of Sun Yet-Sen | Significant higher level of $F_{ENO50}$ in ACO than COPD group<br>No differences in $F_{ENO50}$ levels among the GOLD groups (stage I-IV)                                                                                                                                                                                                                                                             |

## Study Characteristics and Key Findings

|                                  |                                                                                                                                                     |        |                                                                                           |                                                                                           |                                                                                             |                                                                                                                                                                                                                                                                                                                                                                                                                                     |
|----------------------------------|-----------------------------------------------------------------------------------------------------------------------------------------------------|--------|-------------------------------------------------------------------------------------------|-------------------------------------------------------------------------------------------|---------------------------------------------------------------------------------------------|-------------------------------------------------------------------------------------------------------------------------------------------------------------------------------------------------------------------------------------------------------------------------------------------------------------------------------------------------------------------------------------------------------------------------------------|
|                                  | of asthma-COPD overlap syndrome, asthma, and COPD                                                                                                   |        |                                                                                           |                                                                                           | University were retrospectively enrolled in this study.                                     | To differentiate ACO from COPD, the optimal $F_{\text{ENO50}}$ cut-off value was 22.5 ppb with 70% sensitivity and 75% specificity and AUC of 0.78.                                                                                                                                                                                                                                                                                 |
| <b>Ji, et al. (2016) (30)</b>    | Fractional exhaled nitric oxide detection in treatment of asthma-chronic obstructive pulmonary disease overlap syndrome                             | China  | Not mentioned/ICS/LABA                                                                    | $F_{\text{ENO50}}$ was measured using NIOX MINO Aerocrine AB, Sweden                      | N=28 ACO and N=28 healthy subjects were recruited from Kowloon Hospital outpatient or ward. | Significant decrease in the level of $F_{\text{ENO50}}$ among ACO subjects after treatment<br>Higher level of $F_{\text{ENO50}}$ in ACO group than healthy subjects both before and after treatment<br>Positive association between pre and post-treatment $F_{\text{ENO50}}$ levels with sputum eosinophils and serum total IgE<br>No association between $F_{\text{ENO50}}$ levels of pre and post treatment with FEV1% predicted |
| <b>Goto, et al. (2016) (31)</b>  | Fractional exhaled nitric oxide levels in asthma-COPD overlap syndrome: analysis of the National Health and Nutrition Examination Survey, 2007–2012 | USA    | Cross-sectional analysis of the National Health and Nutrition Examination Survey (NHANES) | $F_{\text{ENO50}}$ was measured using Aerocrine NIOX MINO® (Aerocrine AB, Solna, Sweden). | Data of N=197 COPD patient from National Health and Nutrition Examination Survey (NHANES)   | Higher levels of $F_{\text{ENO50}}$ in subjects with ACO (N=48 from 197 COPD) compared to those with COPD alone                                                                                                                                                                                                                                                                                                                     |
| <b>Huang, et al. (2016) (32)</b> | Exercise-Induced                                                                                                                                    | Taiwan | Control, prospective study                                                                | $F_{\text{ENO50}}$ was measured by NIOX MINO                                              | N=62 COPD, N=60 asthma, and N=27                                                            | Higher levels of $F_{\text{ENO50}}$ were in COPD patients compared to healthy                                                                                                                                                                                                                                                                                                                                                       |

## Study Characteristics and Key Findings

|                                      |                                                                                                                            |       |                                                       |                                                                                                                |                                                                                                                                                                           |                                                                                                                                                                                                                                                                                                                                                                                 |
|--------------------------------------|----------------------------------------------------------------------------------------------------------------------------|-------|-------------------------------------------------------|----------------------------------------------------------------------------------------------------------------|---------------------------------------------------------------------------------------------------------------------------------------------------------------------------|---------------------------------------------------------------------------------------------------------------------------------------------------------------------------------------------------------------------------------------------------------------------------------------------------------------------------------------------------------------------------------|
|                                      | Changes in Exhaled NO Differentiates Asthma With or Without Fixed Airway Obstruction From COPD With Dynamic Hyperinflation |       |                                                       | (Aerocrine AB, Sweden), a hand-held device.                                                                    | healthy subjects were recruited from outpatient clinics of Chang Gung Memorial Hospital, Linkuo Medical Center in Taiwan.                                                 | subjects at the baseline. Significant decrease in the change of $F_{\text{ENO50}}$ level after 6MWT in patients with COPD<br>No association between the percentage of $F_{\text{ENO50}}$ change and the % predicted value of FEV1 at baseline or the percent change of FEV1 in COPD patients                                                                                    |
| <b>Kobayashi, et al. (2016) (33)</b> | Inflammatory biomarkers in asthma-COPD overlap syndrome                                                                    | Japan | Cross-sectional study                                 | $F_{\text{ENO50}}$ level was measured using the NIOX MINO device (Aerocrin, Morrisville, NC, USA).             | N=257 COPD patients, data were collected from prospectively consecutively scheduled visits or newly registered patients from the Ishinomaki COPD Network (ICON) registry. | Higher $F_{\text{ENO50}}$ levels in ACO compared to non-ACO<br>No association between $F_{\text{ENO50}}$ levels and ICS therapy in neither ACO nor non-ACO group<br>To diagnose ACO, the best cutoff value of $F_{\text{ENO50}}$ was 23 ppb with AUC 0.74, the sensitivity of 73%, and specificity of 68.2%.                                                                    |
| <b>Feng et al. (2017) (34)</b>       | Relationship between Fractional Exhaled Nitric Oxide Level and Efficacy of Inhaled Corticosteroid in Asthma-COPD Overlap   | China | Not mentioned/ ICS (budesonide inhalation suspension) | The $F_{\text{ENO50}}$ levels were measured using a nitric oxide analyzer (Niox; Aerocrine AB, Solna, Sweden). | N=127 ACO and N=131 healthy subjects were enrolled.                                                                                                                       | Higher $F_{\text{ENO50}}$ levels in ACO patients than healthy subjects at baseline (before ICS therapy)<br>Decrease in $F_{\text{ENO50}}$ levels in all ACO patients compared to pre-treatment levels after ICS therapy<br>Positive association between $F_{\text{ENO50}}$ levels with total serum IgE and sputum eosinophil<br>Negative association between $F_{\text{ENO50}}$ |

## Study Characteristics and Key Findings

|                                      | Syndrome<br>Patients with<br>Different<br>Disease Severity                                                                                                  |       |                                                         |                                                                                                                      |                                                                                                                                                                                                        | levels with FEV1%pred and<br>FEV1/FVC                                                                                                                                                                                                                                                                                                                                         |
|--------------------------------------|-------------------------------------------------------------------------------------------------------------------------------------------------------------|-------|---------------------------------------------------------|----------------------------------------------------------------------------------------------------------------------|--------------------------------------------------------------------------------------------------------------------------------------------------------------------------------------------------------|-------------------------------------------------------------------------------------------------------------------------------------------------------------------------------------------------------------------------------------------------------------------------------------------------------------------------------------------------------------------------------|
| <b>Cosío, et al.<br/>(2017) (35)</b> | Th-2 signature<br>in chronic<br>airway diseases:<br>towards the<br>extinction of<br>Asthma-COPD<br>overlap<br>syndrome?                                     | Spain | Cross-sectional,<br>observational,<br>multicentre study | Not mentioned                                                                                                        | N=89 COPD, N=94<br>asthmatics, and<br>N=109 ACO recruited<br>from 23 outpatient<br>clinics based in<br>tertiary hospitals in<br>Spain.                                                                 | Higher $F_{ENO50}$ in ACO than COPD<br>No significant difference in $F_{ENO50}$<br>between COPD subjects with<br>eosinophilia and those without<br>eosinophilia                                                                                                                                                                                                               |
| <b>Deng, et al.<br/>(2017) (36)</b>  | The value of<br>fractionated<br>exhaled nitric<br>oxide in the<br>diagnosis of<br>asthma-chronic<br>obstructive<br>pulmonary<br>disease overlap<br>syndrome | China | Not mentioned                                           | $F_{ENO50}$ was measured<br>using Naku Lun<br>breath analyzer.                                                       | N=82 COPD, N=76<br>asthma, N=81 ACO,<br>and N=39 healthy<br>non-smoker subjects<br>were recruited from<br>those who had an<br>outpatient visit at<br>Central South<br>University, Xiangya<br>Hospital. | Higher $F_{ENO50}$ levels in ACO patients<br>than COPD patients<br>No association between $F_{ENO50}$ and<br>FEV1% predicted and FEV1/FVC in<br>COPD and ACO<br>To differentiate ACO from COPD<br>patients, the best cutoff value was 29<br>ppb with a sensitivity 80% and<br>specificity 73%.                                                                                |
| <b>Gao et al.<br/>(2017) (37)</b>    | Correlation<br>between<br>fractional<br>exhaled nitric<br>oxide and<br>sputum<br>eosinophilia in<br>exacerbations of<br>COPD                                | China | Cross-sectional study                                   | $F_{ENO50}$ was measured<br>using NO<br>electrochemical<br>equipment (NIOX<br>Vero; Aerocrine AB,<br>Solna, Sweden). | N=68 COPD patients<br>diagnosed to have<br>acute exacerbations<br>visiting the Third<br>People's Hospital of<br>Guangzhou Medical<br>College in Huizhou,<br>China                                      | Elevated $F_{ENO50}$ levels in patients<br>with sputum eosinophilia compared<br>to patients without eosinophilia<br>Significant association between<br>sputum eosinophils and $F_{ENO50}$ levels<br>No significant association between<br>$F_{ENO50}$ levels and blood eosinophil<br>ratio<br>To diagnose sputum eosinophilia, the<br>best $F_{ENO50}$ cut-off value was 17.5 |

## Study Characteristics and Key Findings

|                                 |                                                                                                                |       |                                                                 |                                                                                                                  |                                                                                                                                                               |                                                                                                                                                                                                                                                                                                                                                                                                       |
|---------------------------------|----------------------------------------------------------------------------------------------------------------|-------|-----------------------------------------------------------------|------------------------------------------------------------------------------------------------------------------|---------------------------------------------------------------------------------------------------------------------------------------------------------------|-------------------------------------------------------------------------------------------------------------------------------------------------------------------------------------------------------------------------------------------------------------------------------------------------------------------------------------------------------------------------------------------------------|
| <b>Zhao, et al. (2017) (38)</b> | Albuterol inhalation increases FeNO level in steroid-naive asthmatics but not COPD patients with reversibility | China | Observational, prospective study/<br>Albuterol (bronchodilator) | $F_{\text{ENO}50}$ was measured using a portable nitric oxide analyzer (NIOX MINO; Aerocrine AB, Solna, Sweden). | N=30 steroid-naive asthma, N=25 ICS treated asthma, and N=20 COPD outpatients selected from patients at the Department of Respiratory Medicine at a hospital. | ppb with a sensitivity of 64.5%, specificity of 56.4%, AUC 0.617.<br>No significant change in $F_{\text{ENO}50}$ after albuterol inhalation in COPD patients<br>No significant associations between sputum eosinophils and $F_{\text{ENO}50}$ levels both before and after bronchodilator inhalation<br>No association between the $F_{\text{ENO}50}$ and change in FEV1 after bronchodilator therapy |
|---------------------------------|----------------------------------------------------------------------------------------------------------------|-------|-----------------------------------------------------------------|------------------------------------------------------------------------------------------------------------------|---------------------------------------------------------------------------------------------------------------------------------------------------------------|-------------------------------------------------------------------------------------------------------------------------------------------------------------------------------------------------------------------------------------------------------------------------------------------------------------------------------------------------------------------------------------------------------|

COPD: Chronic obstructive lung disease; UK: United Kingdom;  $F_{\text{ENO}}$ : Fractional exhaled nitric oxide; FEV1: Forced expiratory volume in first second; FVC: Forced vital capacity; ICS: Inhaled corticosteroid; USA: United States of America; GCS: Glucocorticoid, CoV: Coefficient of variation; AUC: Area under the curve; ROC: Receiver operative characteristics; ppb: parts per billion; GOLD: Global Initiative for Chronic Obstructive Lung Disease; BMI: Body mass index; IgE: Immunoglobulin E; FP: Fluticasone; SAL: Salmeterol; TB: Tuberculosis; LABA: Long-acting beta agonist; LAMA: Long-acting muscarinic antagonists; ACO: Asthma-COPD overlap;  $F_{\text{nNO}}$ : Fractional concentration of nasally aspirated/exhaled nitric oxide; FF: Fluticasone furoate; VI: vilanterol; NHANES: National Health and Nutrition Examination Survey; 6MWT: 6-minute walk test; Th-2: T-helper 2

\* for expressing the  $F_{\text{ENO}}$ , the exhalation flow rate (if indicated) was given as a subscript in  $\text{mL}\cdot\text{s}^{-1}$ . For instance, a flow rate of  $50 \text{ mL}\cdot\text{s}^{-1}$  was written  $F_{\text{ENO}50}$ . If there was no direct or indirect evidence regarding the flow rate ( $\text{mL}\cdot\text{s}^{-1}$ ), we only used  $F_{\text{ENO}}$ . The title of articles was excepted from this rule.

\*\*Concerning ACO definitions, the studies used the following definitions; a) One study (35) used this definition: previously diagnosed asthma patients with chronic airflow limitation and a smoking history  $\geq 20$  pack-years, or a diagnosed COPD patients who have a blood eosinophil count  $\geq 200$  eosinophils· $\mu\text{L}^{-1}$ , b) One study (26) defined ACO according to the validated major or minor criteria, if a subject has one of these major criteria, including previous history of asthma/wheezing outside chest infections or a documented very positive bronchodilator test ( $>14\%$  and  $>400 \text{ mL}$  increase in FEV1) or if a subject has two of these minor criteria, including blood eosinophil count  $>3\%$ , IgE levels  $>100 \text{ UI/L}$ , 2 documented positive bronchodilator test with  $>12\%$  or  $200 \text{ mL}$  gain in FEV1, atopy or previous history sensibilization to pneumoallergens

## Study Characteristics and Key Findings

demonstrated by positive skin prick test or specific IgE to allergens, c) One study (29) defined ACO as bronchodilator test with 12% and 200 mL gain in FEV<sub>1</sub>, and presence of clinical characteristics of asthma (previous history of asthma/wheezing), d) Another study (31) defined ACO as self-reported wheezing in past 12 months plus bronchodilator response (FVC increase of 200 mL and 12%) or self-reported physician diagnosis of asthma, also in its sensitive analysis alternative definition of ACO was used which was defined by the presence of one major criterion or two minor criteria. Major criteria included history of asthma and bronchodilator response of  $\geq 15\%$  and 400 mL; minor criteria consisted of history of hay fever, bronchodilator responses to salbutamol of  $\geq 12\%$  and 200 mL, and blood eosinophils  $\geq 5\%$ , e) One study considered high levels of fractional exhaled nitric oxide (FENO > 35 ppb) or immunoglobulin E (IgE  $\geq 173$  IU/mL) in diagnosed COPD as markers of ACO candidate (20), f) One study (33) defined ACO according to the GINA-GOLD joint document (updated 2015) (39), g) One study (36) defined ACO according to the GINA-GOLD joint document 2014 (40). Sputum eosinophilia/elevated sputum eosinophils was defined as sputum eosinophil count  $\geq 2.5\%$  (37) or  $\geq 3\%$  (16) or  $> 3\%$  (23) or no definition (2,7,8,11,19,30,34,35,38). Elevated blood eosinophils was defined as blood eosinophil count  $\geq 1\%$  (37) or  $\geq 200$  eosinophils  $\cdot \mu\text{L}^{-1}$  (35) or no definition (11,19). Treatment response was defined as an increase in FEV<sub>1</sub>  $\geq 200\text{mL}$  (5) or  $> 200\text{mL}$  (14) or  $> 12\%$  and  $> 200\text{ mL}$  (9,16). Treatment response was not defined in three studies (28,34,38). Concerning exacerbation definitions, the studies used the following definitions; a) event-based exacerbation was defined as the use of oral corticosteroids and/or antibiotics and/or hospitalization for a worsening in the patient's respiratory symptoms (4), b) exacerbation was defined as increased dyspnea, cough or sputum (quality or quantity) with a duration  $\geq 3$  days requiring treatment with antibiotics and/or systemic corticosteroids and/or a significant change in prescribed respiratory medication (15), c) exacerbation was defined as the demonstration of any combination of the following symptoms: purulence of sputum, increased dyspnea, or increased production of sputum (21), d) exacerbation was defined as the presence for  $\geq 2$  consecutive days of any two symptoms ("major" symptoms was defined as dyspnoea, increased sputum purulence, increased sputum quantity or "minor" symptoms was defined as wheeze, sore throat, cough and symptoms of a common cold, which were defined as nasal congestion and/or nasal discharge), at least one of which must be a major symptom (1). Exacerbations were not defined in two studies (18,27).

† The flow rate of the nasally exhaled/aspirated nitric oxide ( $F_{\text{nNO}}$ ) was given as a subscript in  $\text{mL} \cdot \text{s}^{-1}$  ( $F_{\text{nNO5}}$ ).

## References

1. Bhowmik A, Seemungal TA, Donaldson GC, Wedzicha JA. Effects of exacerbations and seasonality on exhaled nitric oxide in copd. *Eur Respir J*. 2005;26(6):1009-1015.
2. Foschino Barbaro MP, Carpagnano GE, Spanevello A, Cagnazzo MG, Barnes PJ. Inflammation, oxidative stress and systemic effects in mild chronic obstructive pulmonary disease. *Int J Immunopathol Pharmacol*. 2007;20(4):753-763.
3. Liu J, Sandrini A, Thurston MC, Yates DH, Thomas PS. Nitric oxide and exhaled breath nitrite/nitrates in chronic obstructive pulmonary disease patients. *Respiration*. 2007;74(6):617-623.
4. de Laurentiis G, Maniscalco M, Cianciulli F, Stanziola A, Marsico S, Lundberg JO, Weitzberg E, Sofia M. Exhaled nitric oxide monitoring in copd using a portable analyzer. *Pulm Pharmacol Ther*. 2008;21(4):689-693.
5. Kunisaki KM, Rice KL, Janoff EN, Rector TS, Niewoehner DE. Exhaled nitric oxide, systemic inflammation, and the spirometric response to inhaled fluticasone propionate in severe chronic obstructive pulmonary disease: A prospective study. *Ther Adv Respir Dis*. 2008;2(2):55-64.
6. Beg MF, Alzoghaibi MA, Abba AA, Habib SS. Exhaled nitric oxide in stable chronic obstructive pulmonary disease. *Ann Thorac Med*. 2009;4(2):65-70.
7. Roy K, Smith J, Kolsum U, Borrill Z, Vestbo J, Singh D. Copd phenotype description using principal components analysis. *Respir Res*. 2009;10:41.
8. Dummer JF, Epton MJ, Cowan JO, Cook JM, Condliffe R, Landhuis CE, Smith AD, Taylor DR. Predicting corticosteroid response in chronic obstructive pulmonary disease using exhaled nitric oxide. *Am J Respir Crit Care Med*. 2009;180(9):846-852.
9. Antus B, Barta I, Horvath I, Csiszer E. Relationship between exhaled nitric oxide and treatment response in copd patients with exacerbations. *Respirology*. 2010;15(3):472-477.
10. Lehouck A, Carremans C, De Bent K, Decramer M, Janssens W. Alveolar and bronchial exhaled nitric oxide in chronic obstructive pulmonary disease. *Respir Med*. 2010;104(7):1020-1026.
11. Tilemann L, Gindner L, Meyer F, Szecsenyi J, Schneider A. Differences in local and systemic inflammatory markers in patients with obstructive airways disease. *Prim Care Respir J*. 2011;20(4):407-414.
12. Rouhos A, Kainu A, Piirila P, Sarna S, Lindqvist A, Karjalainen J, Sovijarvi AR. Repeatability of exhaled nitric oxide measurements in patients with copd. *Clin Physiol Funct Imaging*. 2011;31(1):26-31.
13. Bazeghi N, Gerds TA, Budtz-Jorgensen E, Hove J, Vestbo J. Exhaled nitric oxide measure using multiple flows in clinically relevant subgroups of copd. *Respir Med*. 2011;105(9):1338-1344.
14. Akamatsu K, Matsunaga K, Sugiura H, Koarai A, Hirano T, Minakata Y, Ichinose M. Improvement of airflow limitation by fluticasone propionate/salmeterol in chronic obstructive pulmonary disease: What is the specific marker? *Front Pharmacol*. 2011;2:36.

## Study Characteristics and Key Findings

15. Antus B, Barta I. Relationship between exhaled nitric oxide and the frequency of severe acute exacerbation of copd: 3-year follow-up. *Acta Physiol Hung*. 2013;100(4):469-477.
16. Soter S, Barta I, Antus B. Predicting sputum eosinophilia in exacerbations of copd using exhaled nitric oxide. *Inflammation*. 2013;36(5):1178-1185.
17. Donohue JF, Herje N, Crater G, Rickard K. Characterization of airway inflammation in patients with copd using fractional exhaled nitric oxide levels: A pilot study. *Int J Chron Obstruct Pulmon Dis*. 2014;9:745-751.
18. Xia Q, Pan P, Wang Z, Lu R, Hu C. [fractional exhaled nitric oxide in bronchial inflammatory lung diseases]. *Zhong Nan Da Xue Xue Bao Yi Xue Ban*. 2014;39(4):365-370.
19. Rawy AM, Mansour AI. Fraction of exhaled nitric oxide measurement as a biomarker in asthma and copd compared with local and systemic inflammatory markers. *Egyptian Journal of Chest Diseases and Tuberculosis*. 2015;64(1):13-20.
20. Tamada T, Sugiura H, Takahashi T, Matsunaga K, Kimura K, Katsumata U, Takekoshi D, Kikuchi T, Ohta K, Ichinose M. Biomarker-based detection of asthma-copd overlap syndrome in copd populations. *Int J Chron Obstruct Pulmon Dis*. 2015;10:2169-2176.
21. Durmaz D, Goksu E, Kilic T, Ozbudak O, Eray O. The role of nitric oxide in predicting revisit of patients with exacerbated chronic obstructive pulmonary disease. *J Emerg Med*. 2015;48(2):247-253.
22. Ishiura Y, Fujimura M, Shiba Y, Ohkura N, Hara J, Kasahara K. A comparison of the efficacy of once-daily fluticasone furoate/vilanterole with twice-daily fluticasone propionate/salmeterol in asthma-copd overlap syndrome. *Pulm Pharmacol Ther*. 2015;35:28-33.
23. Chou KT, Su KC, Huang SF, Hsiao YH, Tseng CM, Su VY, Hung SC, Perng DW. Exhaled nitric oxide predicts eosinophilic airway inflammation in copd. *Lung*. 2014;192(4):499-504.
24. Santini G, Mores N, Shohreh R, Valente S, Dabrowska M, Trove A, Zini G, Cattani P, Fuso L, Mautone A, et al. Exhaled and non-exhaled non-invasive markers for assessment of respiratory inflammation in patients with stable copd and healthy smokers. *J Breath Res*. 2016;10(1):017102.
25. Arif AA, Mitchell C. Use of exhaled nitric oxide as a biomarker in diagnosis and management of chronic obstructive pulmonary disease. *J Prim Care Community Health*. 2016;7(2):102-106.
26. Alcazar-Navarrete B, Romero-Palacios PJ, Ruiz-Sancho A, Ruiz-Rodriguez O. Diagnostic performance of the measurement of nitric oxide in exhaled air in the diagnosis of copd phenotypes. *Nitric Oxide*. 2016;54:67-72.
27. Logotheti H, Pourzitaki C, Tsaousi G, Aidoni Z, Vekrakou A, Ekaterini A, Gourgoulisanis K. The role of exhaled nitric oxide in patients with chronic obstructive pulmonary disease undergoing laparotomy surgery - the noxious study. *Nitric Oxide*. 2016;61:62-68.
28. Amer M, Cowan J, Gray A, Brockway B, Dummer J. Effect of inhaled beta2-agonist on exhaled nitric oxide in chronic obstructive pulmonary disease. *PLoS One*. 2016;11(6):e0157019.
29. Chen FJ, Huang XY, Liu YL, Lin GP, Xie CM. Importance of fractional exhaled nitric oxide in the differentiation of asthma-copd overlap syndrome, asthma, and copd. *Int J Chron Obstruct Pulmon Dis*. 2016;11:2385-2390.

## Study Characteristics and Key Findings

30. Ji Z, Pan X, Ji F, Ni DT, Shang Y, Bai C. Fractional exhaled nitric oxide detection in treatment of asthma-chronic obstructive pulmonary disease overlap syndrome. [chinese]. Academic Journal of Second Military Medical University. 2016;37(10):1250-1255.
31. Goto T, Camargo CA, Jr., Hasegawa K. Fractional exhaled nitric oxide levels in asthma-copd overlap syndrome: Analysis of the national health and nutrition examination survey, 2007-2012. *Int J Chron Obstruct Pulmon Dis*. 2016;11:2149-2155.
32. Huang SY, Chou PC, Wang TY, Lo YL, Joa WC, Chen LF, Sheng TF, Chung KF, Wang CH, Kuo HP. Exercise-induced changes in exhaled no differentiates asthma with or without fixed airway obstruction from copd with dynamic hyperinflation. *Medicine (Baltimore)*. 2016;95(15):e3400.
33. Kobayashi S, Hanagama M, Yamanda S, Ishida M, Yanai M. Inflammatory biomarkers in asthma-copd overlap syndrome. *Int J Chron Obstruct Pulmon Dis*. 2016;11:2117-2123.
34. Feng JX, Lin Y, Lin J, He SS, Chen MF, Wu XM, Xu YZ. Relationship between fractional exhaled nitric oxide level and efficacy of inhaled corticosteroid in asthma-copd overlap syndrome patients with different disease severity. *J Korean Med Sci*. 2017;32(3):439-447.
35. Cosio BG, Perez de Llano L, Lopez Vina A, Torrego A, Lopez-Campos JL, Soriano JB, Martinez Moragon E, Izquierdo JL, Bobolea I, Callejas J, et al. Th-2 signature in chronic airway diseases: Towards the extinction of asthma-copd overlap syndrome? *Eur Respir J*. 2017;49(5).
36. Deng DD, Zhou AY, Shuang QC, Chen P. [the value of fractionated exhaled nitric oxide in the diagnosis of asthma-chronic obstructive pulmonary disease overlap syndrome]. *Chung-Hua Chieh Ho Ho Hu Hsi Tsa Chih Chinese Journal of Tuberculosis & Respiratory Diseases*. 2017;40(2):98-101.
37. Gao J, Zhang M, Zhou L, Yang X, Wu H, Zhang J, Wu F. Correlation between fractional exhaled nitric oxide and sputum eosinophilia in exacerbations of copd. *Int J Chron Obstruct Pulmon Dis*. 2017;12:1287-1293.
38. Zhao H, Li R, Lv Y, Dong H, Yao L, Wu Y, Xiao G, Cai S. Albuterol inhalation increases feno level in steroid-naive asthmatics but not copd patients with reversibility. *Clin Respir J*. 2017;11(3):328-336.
39. Global initiative for asthma. Diagnosis of diseases of chronic airflow limitation: Asthma, copd and asthma-copd overlap syndrome (ACOS). A joint project of gina and gold. 2015.
40. Global initiative for asthma. Diagnosis of diseases of chronic airflow limitation: Asthma, copd and asthma-copd overlap syndrome (ACOS). A joint project of gina and gold. 2014.
